# Supplementary material for: Glutamine Synthetase and Glutamate Synthase Family Perform Diverse Physiological Functions in Exogenous Hormones and Abiotic Stress Responses in Pyrus betulifolia Bunge (P.be)
Source: MDPI journal article supplement (doi:10.3390/plants13192759), 2024-10-01
Supplement: s1 [file s1]

# Glutamine Synthetase and Glutamate Synthase Family Perform Diverse Physiological Functions in Exogenous Hormones and Abiotic Stress Responses in *Pyrus betulifolia* Bunge (*P.be*)

Weilong Zhang<sup>1</sup>, Shuai Yuan<sup>1</sup>, Na Liu<sup>1,2</sup>, Haixia Zhang<sup>1,2,\*</sup> and Yuxing Zhang<sup>1,2,\*</sup>

<sup>1</sup> College of Horticulture, Hebei Agricultural University, Baoding, 071001, China

<sup>2</sup> Pear technology and innovation center of Hebei Province, Baoding, 071001, China

\* Correspondence: zhx2323a@163.com, zhyx@hebau.edu.cn.

## Supplementary Data

**Table S1** Sequences of primers used in qRT-PCR.

| Gene                  | Forward primer sequence (5'–3') | Reverse primer sequence (5'–3') |
|-----------------------|---------------------------------|---------------------------------|
| <i>PbeGS1.1</i>       | GGACCAGTAACAGACCCAGC            | CGCATCGCATATCACCAGGA            |
| <i>PbeGS1.2</i>       | AGAAACTGAGTCTGCGCCAC            | TCAGTTTCACGACCAACCCG            |
| <i>PbeGS1.3</i>       | ATGTCGTAGCCGAAGAACCC            | TCACGCCCCAAAGGACTTCTC           |
| <i>PbeGS1.4</i>       | TCGACCTCTCAGACAGCACT            | GATCACTCACTGGTCCTGGC            |
| <i>PbeGS1.5</i>       | CGCACTACAAGGCCTGTCTC            | GAGCTGCCCCACAGTTCATCT           |
| <i>PbeGS2.1</i>       | AAACCGATAGAGGGTGACTGG           | TCACCGTGCGAAGTGACA              |
| <i>PbeGS2.2</i>       | ATTGGATCGGAGGGTCAGG             | GTCCGGTACTTGATCCATCGT           |
| <i>PbeFd-GOGAT</i>    | TAAATCGAAGCGGACTCGCA            | AGTGGCAATTCCTGGAGACG            |
| <i>PbeNADH-GOGAT1</i> | GCGACGGTAGCAGAGAAGTT            | CTTCCTCCTCGTTCAAGTCGT           |
| <i>PbeNADH-GOGAT2</i> | CAGGGGCTAAGGCAGTTGTC            | TGTGGCGTTGATGTTGTTGTAT          |
| <i>PbActin</i>        | TTGGTATGGGTCAGAGG               | CTGTGAGCAGAACTGGGTG             |
